# Supplementary material for: Comparative analysis of mite genomes reveals positive selection for diet adaptation
Source: PubMed Central journal article supplement (PMC8175442; doi:10.1038/s42003-021-02173-3), 2021-06-03
Supplement: 42003_2021_2173_MOESM2_ESM.pdf [file 42003_2021_2173_MOESM2_ESM.pdf]

**Supplemental Information**

**Title: Comparative analysis of mite genomes reveals positive selection for diet adaptation**

**Authors: Liu et al.**

**Correspondences: [chende@bnu.edu.cn](mailto:chende@bnu.edu.cn); [wei19@mail.sysu.edu.cn](mailto:wei19@mail.sysu.edu.cn);**

**This pdf file includes:**

**Supplementary Figures 1-3**

**Supplementary Tables 1-2**

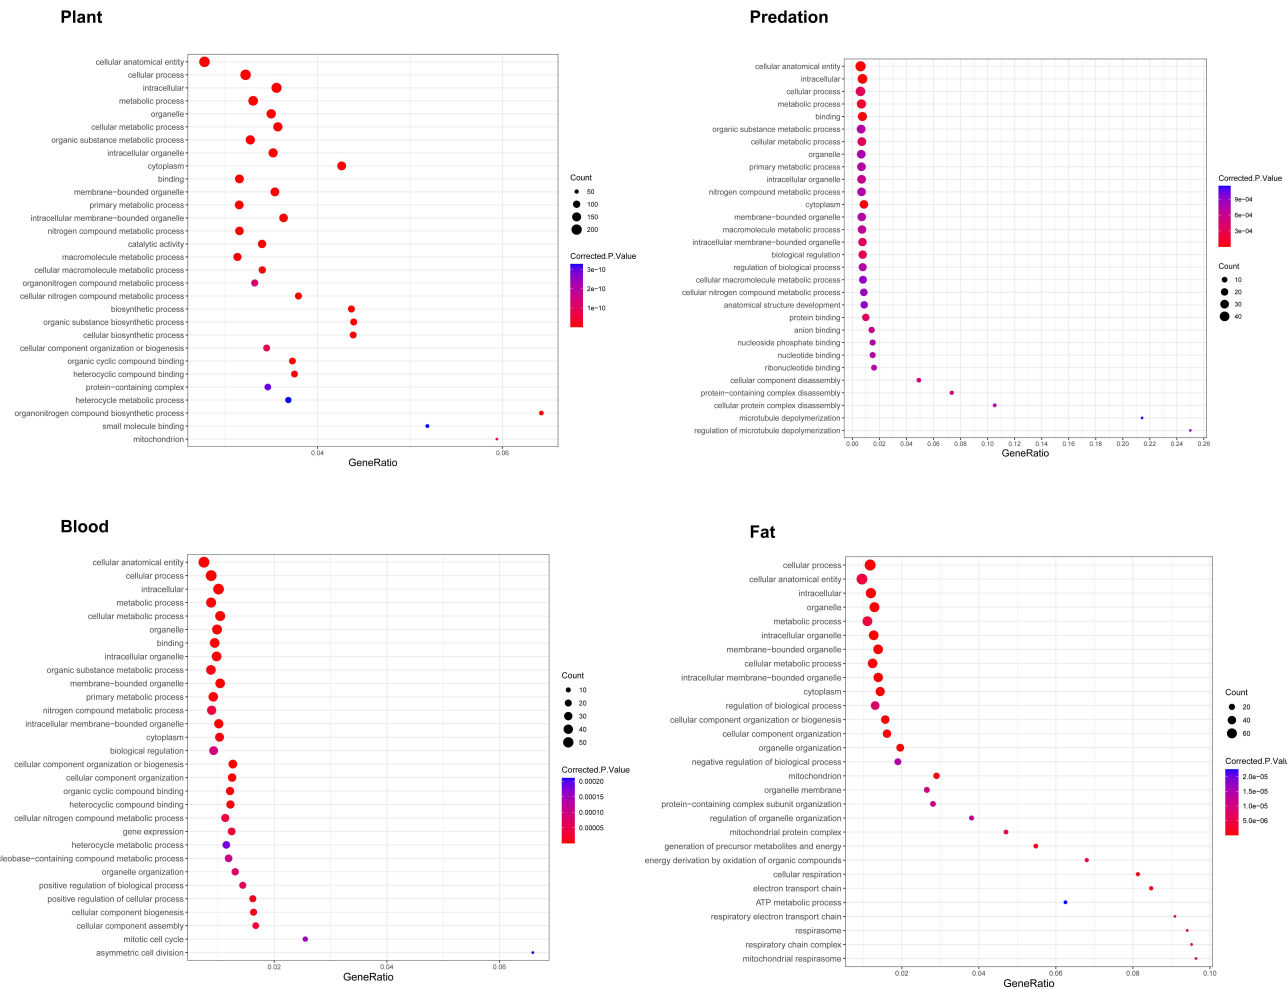

**Supplementary Figure 1. Gene Ontology enrichment of PSGs.** Gene Ontology enrichment of PSGs in each group generated by all the orthologous genes.

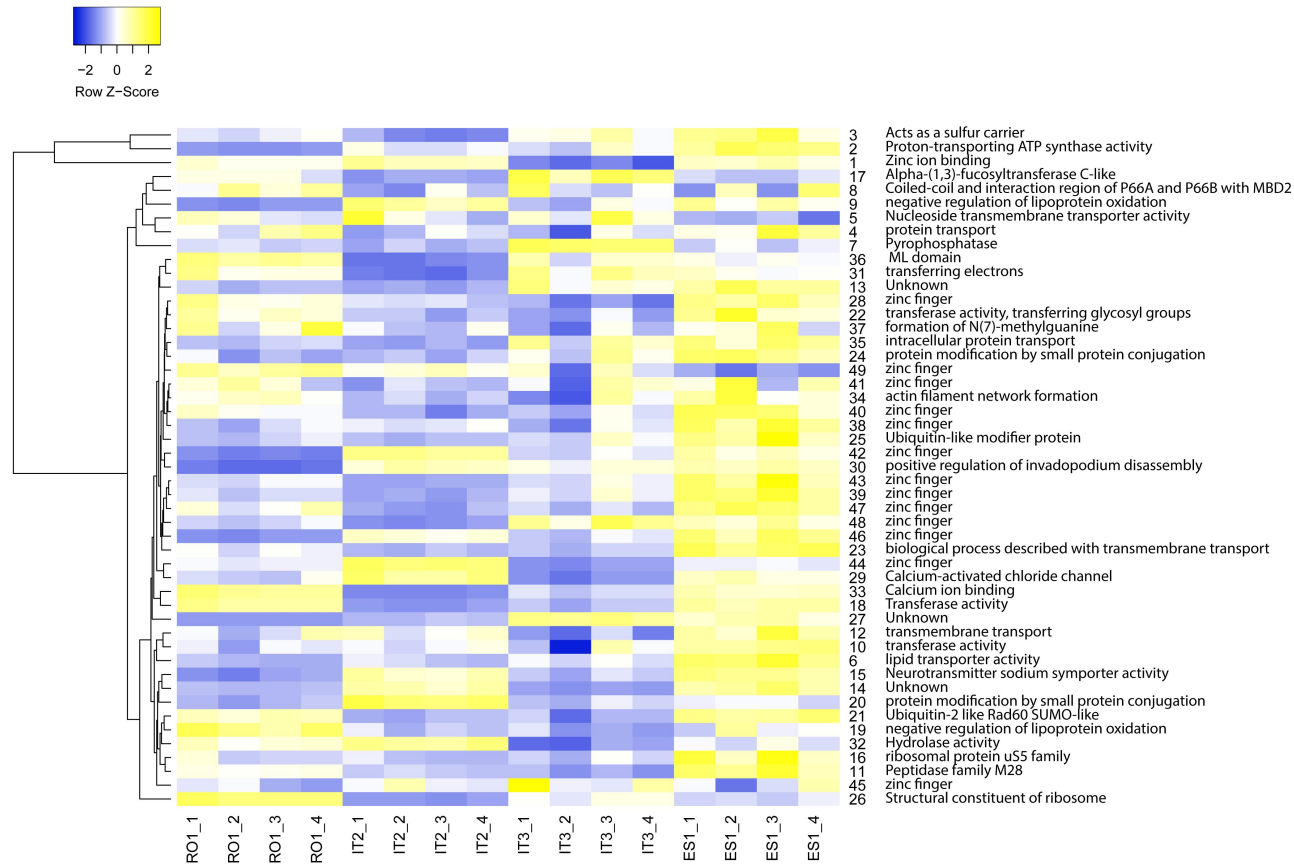

**pSupplementary Figure 2. Top 50 gene expression in four population of spider mite.** Heatmap and hierarchical clustering show gene expression of top 50 expressed genes (Displayed as absolute standardized RPKM values) found in four population (RO1, IT2, IT3, and ES1) of *Tetranychus urticae*.

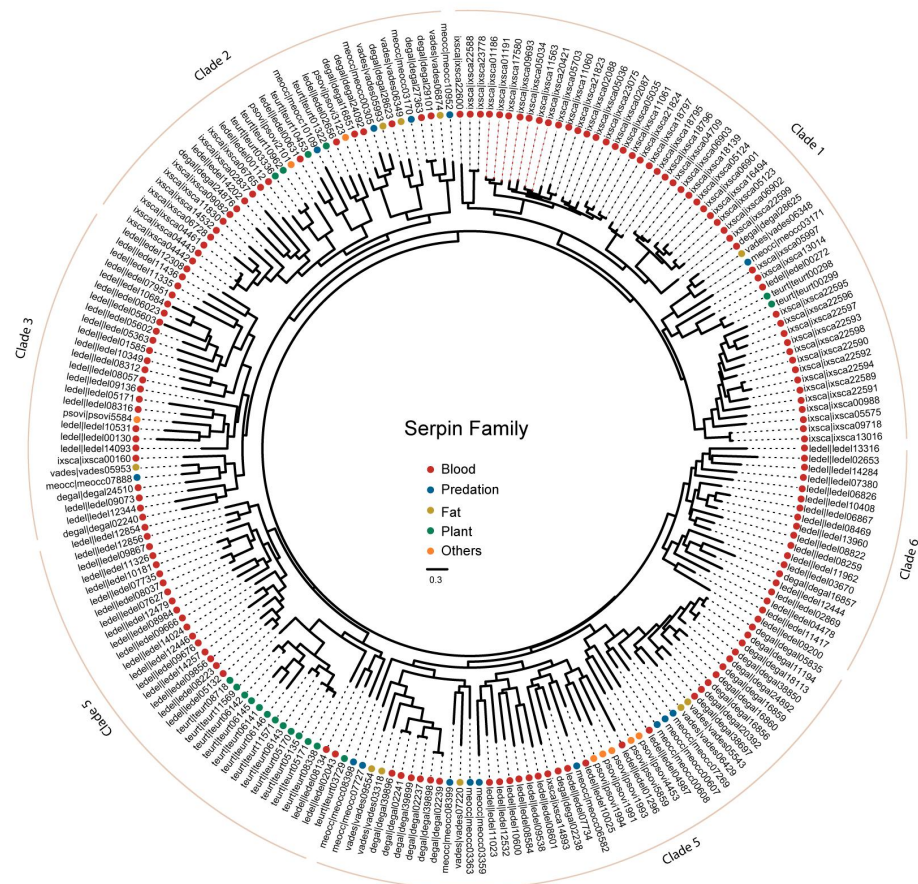

**Supplementary Figure 3. Expansion of Serpin Family in blood feeding mites.** A phylogenetic analysis using amino acid sequences containing the serpin domain in blood feeding group and other groups is shown. The tree was built based on Maximum Likelihood method. All nodes have significant bootstrap support based on 1000 replicates. Branches of different colors show their

taxa, as shown in the figure legend. The outer numbers indicate the six clades derived from this study, the ranges of which are marked by orange circles.

**Supplementary Table 1. Completeness of genomes and genes**

| Latin name                        | BUSCO_Genome                                  | BUSCO_Gene                                     |
|-----------------------------------|-----------------------------------------------|------------------------------------------------|
| <i>Ixodes scapularis</i>          | C:95.4%[S:58.1%,D:37.3%],F:0.3%,M:4.3%,n:303  | C:95.8%[S:84.2%,D:11.6%],F:0.4%,M:3.8%,n:2934  |
| <i>Metaseiulus occidentalis</i>   | C:96.7%[S:93.7%,D:3.0%],F:1.0%,M:2.3%,n:303   | C:98.4%[S:95.6%,D:2.8%],F:0.1%,M:1.5%,n:2934   |
| <i>Dermanyssus gallinae</i> *     | C:95.0%[S:78.2%,D:16.8%],F:0.3%,M:4.7%,n:303  | C:78.0%[S:67.1%,D:10.9%],F:6.2%,M:15.8%,n:2934 |
| <i>Tropilaelaps mercedesae</i>    | C:90.4%[S:90.1%,D:0.3%],F:5.3%,M:4.3%,n:303   | C:93.3%[S:91.8%,D:1.5%],F:2.9%,M:3.8%,n:2934   |
| <i>Varroa destructor</i>          | C:95.7%[S:94.4%,D:1.3%],F:1.7%,M:2.6%,n:303   | C:98.5%[S:97.3%,D:1.2%],F:0.1%,M:1.4%,n:2934   |
| <i>Varroa jacobsoni</i>           | C:96.7%[S:95.4%,D:1.3%],F:1.3%,M:2.0%,n:303   | C:99.1%[S:98.2%,D:0.9%],F:0.0%,M:0.9%,n:2934   |
| <i>Steganacarus magnus</i> *      | C:85.5%[S:84.2%,D:1.3%],F:7.9%,M:6.6%,n:303   | C:36.9%[S:36.0%,D:0.9%],F:7.8%,M:55.3%,n:2934  |
| <i>Hypochthonius rufulus</i> *    | C:89.1%[S:87.1%,D:2.0%],F:5.9%,M:5.0%,n:303   | C:28.8%[S:27.9%,D:0.9%],F:6.6%,M:64.6%,n:2934  |
| <i>Sarcoptes scabiei</i>          | C:91.1%[S:91.1%,D:0.0%],F:4.0%,M:4.9%,n:303   | C:88.9%[S:88.0%,D:0.9%],F:3.3%,M:7.8%,n:2934   |
| <i>Dermatophagoides farinae</i> * | C:95.4%[S:77.6%,D:17.8%],F:0.7%,M:3.9%,n:303  | C:90.6%[S:72.6%,D:18.0%],F:1.5%,M:7.9%,n:2934  |
| <i>Psoroptes ovis</i> *           | C:93.7%[S:92.7%,D:1.0%],F:2.0%,M:4.3%,n:303   | C:66.7%[S:65.4%,D:1.3%],F:3.3%,M:30.0%,n:2934  |
| <i>Leptotrombidium deliense</i>   | C:84.5%[S:83.5%,D:1.0%],F:6.3%,M:9.2%,n:303   | C:84.5%[S:82.4%,D:2.1%],F:3.9%,M:11.6%,n:2934  |
| <i>Dinothrombium tinctorium</i>   | C:80.5%[S:41.9%,D:38.6%],F:4.3%,M:15.2%,n:303 | C:87.6%[S:52.7%,D:34.9%],F:1.9%,M:10.5%,n:2934 |
| <i>Brevipalpus yothersi</i> *     | C:83.9%[S:82.2%,D:1.7%],F:3.0%,M:13.1%,n:303  | C:49.0%[S:47.1%,D:1.9%],F:5.8%,M:45.2%,n:2934  |
| <i>Tetranychus urticae</i>        | C:93.7%[S:89.4%,D:4.3%],F:1.3%,M:5.0%,n:303   | C:94.2%[S:88.2%,D:6.0%],F:0.4%,M:5.4%,n:2934   |
| <i>Stegodyphus mimosarum</i>      | C:88.1%[S:85.1%,D:3.0%],F:5.3%,M:6.6%,n:303   | C:88.2%[S:85.1%,D:3.1%],F:8.0%,M:3.8%,n:2934   |

**Supplementary Table 2. Gene family expansion and contraction in each group**

| Clade                           | Diet group | ID        | Annotation | Expansion/Contraction | Ancestor_size | Node_size | P.value     |
|---------------------------------|------------|-----------|------------|-----------------------|---------------|-----------|-------------|
| <i>Dermanyssus gallinae</i>     | blood      | OG0000075 | TxS        | Expansion             | 4             | 14        | 5.22E-07    |
| <i>Ixodes scapularis</i>        | blood      | OG0000075 | TxS        | Expansion             | 4             | 58        | 1.59E-23    |
| <i>Leptotrombidium deliense</i> | blood      | OG0000103 | CPVL       | Expansion             | 16            | 30        | 2.97E-05    |
| <i>Dermanyssus gallinae</i>     | blood      | OG0000103 | CPVL       | Expansion             | 7             | 32        | 4.30E-16    |
| <i>Ixodes scapularis</i>        | blood      | OG0000103 | CPVL       | Expansion             | 8             | 24        | 2.24E-05    |
| <i>Leptotrombidium deliense</i> | blood      | OG0000515 | MALRD1     | Expansion             | 4             | 18        | 1.05E-08    |
| <i>Ixodes scapularis</i>        | blood      | OG0000515 | MALRD1     | Expansion             | 2             | 8         | 0.00216866  |
| <i>Leptotrombidium deliense</i> | blood      | OG0000186 | NA         | Expansion             | 12            | 24        | 6.36E-05    |
| <i>Ixodes scapularis</i>        | blood      | OG0000186 | NA         | Expansion             | 6             | 24        | 1.07E-06    |
| <i>Dermanyssus gallinae</i>     | blood      | OG0000318 | NA         | Expansion             | 3             | 7         | 0.00265511  |
| <i>Ixodes scapularis</i>        | blood      | OG0000318 | NA         | Expansion             | 3             | 10        | 0.00196722  |
| <i>Leptotrombidium deliense</i> | blood      | OG0000181 | FMO5       | Expansion             | 6             | 25        | 8.02E-11    |
| <i>Ixodes scapularis</i>        | blood      | OG0000181 | FMO5       | Expansion             | 6             | 18        | 0.000185547 |
| <i>Dermanyssus gallinae</i>     | blood      | OG0000059 | serpin     | Expansion             | 9             | 16        | 0.00139288  |
| <i>Ixodes scapularis</i>        | blood      | OG0000059 | serpin     | Expansion             | 13            | 34        | 6.08E-06    |
| <i>Dermanyssus gallinae</i>     | blood      | OG0000195 | 4CL        | Expansion             | 8             | 15        | 0.000826224 |
| <i>Ixodes scapularis</i>        | blood      | OG0000195 | 4CL        | Expansion             | 10            | 46        | 3.14E-12    |
| <i>Leptotrombidium deliense</i> | blood      | OG0000058 | TTPAL      | Expansion             | 9             | 15        | 0.00771831  |
| <i>Ixodes scapularis</i>        | blood      | OG0000058 | TTPAL      | Expansion             | 17            | 42        | 1.75E-06    |
| <i>Metaseiulus occidentalis</i> | predation  | OG0000074 | TIGD6      | Expansion             | 9             | 16        | 0.0048569   |
| <i>Stegodyphus mimosarum</i>    | predation  | OG0000074 | TIGD6      | Expansion             | 17            | 40        | 0.0010036   |
| <i>Dinotrombium tinctorium</i>  | predation  | OG0000318 | NA         | Expansion             | 2             | 10        | 5.86E-06    |
| <i>Stegodyphus mimosarum</i>    | predation  | OG0000318 | NA         | Expansion             | 1             | 8         | 0.00271694  |

|                                 |           |           |          |             |    |    |             |
|---------------------------------|-----------|-----------|----------|-------------|----|----|-------------|
| <i>Dinotrombium tinctorium</i>  | predation | OG0000075 | TxS      | Expansion   | 6  | 11 | 0.00790888  |
| <i>Metaseiulus occidentalis</i> | predation | OG0000075 | TxS      | Expansion   | 4  | 18 | 2.09E-08    |
| <i>Stegodyphus mimosarum</i>    | predation | OG0000075 | TxS      | Expansion   | 1  | 8  | 0.00271694  |
| <i>Dinotrombium tinctorium</i>  | predation | OG0000125 | nas-15   | Expansion   | 12 | 19 | 0.0064872   |
| <i>Stegodyphus mimosarum</i>    | predation | OG0000125 | nas-15   | Expansion   | 12 | 37 | 7.74E-05    |
| <i>Dinotrombium tinctorium</i>  | predation | OG0000446 | Nhe2     | Expansion   | 4  | 11 | 0.000202732 |
| <i>Stegodyphus mimosarum</i>    | predation | OG0000446 | Nhe2     | Expansion   | 1  | 9  | 0.00134242  |
| <i>Dinotrombium tinctorium</i>  | predation | OG0000080 | KIAA1919 | Expansion   | 13 | 33 | 6.89E-09    |
| <i>Metaseiulus occidentalis</i> | predation | OG0000080 | KIAA1919 | Expansion   | 13 | 22 | 0.00198076  |
| <i>Dinotrombium tinctorium</i>  | predation | OG0000139 | NA       | Expansion   | 7  | 14 | 0.00136658  |
| <i>Stegodyphus mimosarum</i>    | predation | OG0000139 | NA       | Expansion   | 13 | 55 | 2.99E-08    |
| <i>Dinotrombium tinctorium</i>  | predation | OG0000761 | ADAMTS9  | Expansion   | 1  | 4  | 0.00348817  |
| <i>Stegodyphus mimosarum</i>    | predation | OG0000761 | ADAMTS9  | Expansion   | 1  | 9  | 0.00134242  |
| <i>Dinotrombium tinctorium</i>  | predation | OG0000462 | NA       | Expansion   | 3  | 7  | 0.00531858  |
| <i>Metaseiulus occidentalis</i> | predation | OG0000462 | NA       | Expansion   | 1  | 4  | 0.00408582  |
| Common ancestor                 | plant     | OG0000078 | NA       | Expansion   | 13 | 23 | 9.39E-05    |
| Common ancestor                 | plant     | OG0000143 | FASN     | Expansion   | 7  | 14 | 2.38E-04    |
| Common ancestor                 | plant     | OG0000061 | Cyp18a1  | Expansion   | 11 | 18 | 1.88E-03    |
| Common ancestor                 | plant     | OG0000444 | NA       | Expansion   | 4  | 8  | 3.67E-03    |
| Common ancestor                 | plant     | OG0000176 | CTSB     | Expansion   | 8  | 13 | 5.64E-03    |
| Common ancestor                 | plant     | OG0000811 | DNA2     | Expansion   | 1  | 3  | 9.53E-03    |
| Common ancestor                 | fat       | OG0000075 | TxS      | Contraction | 4  | 0  | 1.09E-05    |
| Common ancestor                 | fat       | OG0000113 | H3F3A    | Contraction | 4  | 0  | 1.09E-05    |
| Common ancestor                 | fat       | OG0000148 | NA       | Contraction | 4  | 0  | 1.09E-05    |
| Common ancestor                 | fat       | OG0000083 | FAR1     | Contraction | 12 | 7  | 0.000385403 |



|                 |     |           |        |             |    |   |             |
|-----------------|-----|-----------|--------|-------------|----|---|-------------|
| Common ancestor | fat | OG0000103 | CPVL   | Contraction | 7  | 3 | 0.000406356 |
| Common ancestor | fat | OG0000087 | mks-3  | Contraction | 4  | 1 | 0.000799169 |
| Common ancestor | fat | OG0000098 | ybhF_2 | Contraction | 5  | 2 | 0.00164907  |
| Common ancestor | fat | OG0000126 | hta1   | Contraction | 11 | 7 | 0.00216877  |
| Common ancestor | fat | OG0000371 | LGMN   | Contraction | 2  | 0 | 0.00276625  |
| Common ancestor | fat | OG0000074 | TIGD6  | Contraction | 3  | 1 | 0.00721711  |
| Common ancestor | fat | OG0000130 | STOM   | Contraction | 3  | 1 | 0.00721711  |
| Common ancestor | fat | OG0000059 | serpin | Contraction | 9  | 6 | 0.00895224  |
| Common ancestor | fat | OG0000099 | NA     | Contraction | 9  | 6 | 0.00895224  |

---
