# Supplementary material for: Comparative analysis of mite genomes reveals positive selection for diet adaptation
Source: PubMed Central journal article supplement (PMC8175442; doi:10.1038/s42003-021-02173-3), 2021-06-03
Supplement: 42003_2021_2173_MOESM3_ESM.pdf [file 42003_2021_2173_MOESM3_ESM.pdf]

## **Description of Additional Supplementary Files**

**File name: Supplementary Data 1**

**Description:** Pseudogene gene list.

**File name: Supplementary Data 2**

**Description:** Raw data of Figure 2,3,5,6, Supplementary figure 1.

**File name: Supplementary Data 3**

**Description:** Top 200 highly expressed gene list in herbivorous species.
